# Supplementary material
Source: Copernicus journal article supplement (doi:10.5194/acp-26-6427-2026)
Supplement: Supplementary file 1 [file acp-26-6427-2026-supplement.pdf]

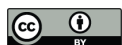

*Supplement of*

## **A modeling study of global distribution and formation pathways of highly oxygenated organic molecules (HOMs) from monoterpenes**

**Xinyue Shao et al.**

*Correspondence to:* Xinyi Dong ([dongxy@nju.edu.cn](mailto:dongxy@nju.edu.cn)) and Minghuai Wang ([minghuai.wang@nju.edu.cn](mailto:minghuai.wang@nju.edu.cn))

The copyright of individual parts of the supplement might differ from the article licence.

## Text S1.

The formation, photolysis, scavenging, and gas-particle partitioning processes of HOMs-SOA are detailed introduced as follows.

### 1. Monoterpene oxidation

The new branching which forms RO<sub>2</sub> that can undergo autoxidation are included in the original monoterpene + OH/O<sub>3</sub> reactions, as shown in Table S1 and S2. The HOMs-SOA formed by the initial oxidation between monoterpenes and NO<sub>3</sub> radical are not considered here because the branching ratio may be very low and remain large uncertainties (Roldin et al., 2019), although the NO<sub>3</sub>-initiated HOMs-SOA are reported and may be significant in the nighttime (Nah et al., 2016; Yan et al., 2016). The APINO<sub>2</sub>, BPINO<sub>2</sub>, LIMONO<sub>2</sub>, and MYRCO<sub>2</sub> are the original formed RO<sub>2</sub> that cannot form HOMs. Here we used high branching ratios in the generation of MT-bRO<sub>2</sub> as shown in Table S3 in Xu et al. (2022). The branching ratios of the yield of MT-aRO<sub>2</sub> to the yield of MT-bRO<sub>2</sub> ( $f_{\text{MT-aRO}_2}/f_{\text{MT-bRO}_2}$ ) for the monoterpenes + OH reaction is 0.25:0.75. The  $f_{\text{MT-aRO}_2}/f_{\text{MT-bRO}_2}$  for the monoterpenes + O<sub>3</sub> reaction is 0.92:0.08. All the branching ratios used here are within the ranged used in the previous studies. The yields range of MT-bRO<sub>2</sub> formed by monoterpenes + OH and monoterpenes + O<sub>3</sub> are 0.075 ~ 0.83 (Lee et al., 2023; Piletic and Kleindienst, 2022; Pye et al., 2019; Weber et al., 2020; Xu et al., 2019) and 0 ~ 0.22 (Ehn et al., 2014; Jokinen et al., 2015; Roldin et al., 2019), respectively. The reaction rate constants are the same as the default monoterpenes + OH/O<sub>3</sub> reactions.

**Table S1.** initial oxidation between monoterpenes and OH radical

| Index | Reactions                                                        | Reaction rate       |
|-------|------------------------------------------------------------------|---------------------|
| 1     | APIN + OH → 0.25*APINO <sub>2</sub> + 0.75*MT-bRO <sub>2</sub>   | 1.34e-11*exp(410/T) |
| 2     | BPIN + OH → 0.25*BPINO <sub>2</sub> + 0.75*MT-bRO <sub>2</sub>   | 1.62e-11*exp(460/T) |
| 3     | LIMON + OH → 0.25*LIMONO <sub>2</sub> + 0.75*MT-bRO <sub>2</sub> | 3.41e-11*exp(470/T) |
| 4     | MYRC + OH → 0.25*MYRCO <sub>2</sub> + 0.75*MT-bRO <sub>2</sub>   | 2.1e-10             |

**Table S2.** initial oxidation between monoterpenes and O<sub>3</sub>

| Index | Reactions                                                                                                                                                                                                      | Reaction rate           |
|-------|----------------------------------------------------------------------------------------------------------------------------------------------------------------------------------------------------------------|-------------------------|
| 5     | APIN + O <sub>3</sub> →<br>0.736*APINO <sub>2</sub> + 0.064*MT-bRO <sub>2</sub> + 0.77*OH + 0.066*TERPA2O <sub>2</sub> +<br>0.22*H <sub>2</sub> O <sub>2</sub> + 0.044*TERPA + 0.002*TERPACID + 0.034*TERPA2 + | 1.34e-11*<br>exp(410/T) |

|   |                                                                                                                                                                                                 |                       |
|---|-------------------------------------------------------------------------------------------------------------------------------------------------------------------------------------------------|-----------------------|
|   | $0.17*HO_2 + 0.17*CO + 0.27*CH_2O + 0.054*TERPA_2CO_3$                                                                                                                                          |                       |
| 6 | $BPIN + O_3 \rightarrow$<br>$0.736*BPINO_2 + 0.064*MT-bRO_2 + 0.102*TERPK + 0.3*OH +$<br>$0.06*TERPA_2CO_3 + 0.32*H_2O_2 + 0.038*BIGALK + 0.19*CO_2 +$<br>$0.81*CH_2O + 0.11*HMHP + 0.08*HCOOH$ | $1.62e-11*exp(460/T)$ |
| 7 | $LIMON + O_3 \rightarrow$<br>$0.736*LIMONO_2 + 0.064*MT-bRO_2 + 0.66*OH + 0.132*TERPF1 +$<br>$0.33*CH_3CO_3 + 0.33*CH_2O + 0.066*TERPA_3CO_3 + 0.33*H_2O_2 +$<br>$0.002*TERPACID$               | $3.41e-11*exp(470/T)$ |
| 8 | $MYRC + O_3 \rightarrow$<br>$0.736*MYRCO_2 + 0.064*MT-bRO_2 + 0.2*TERPF2 + 0.63*OH +$<br>$0.63*HO_2 + 0.25*CH_3COCH_3 + 0.39*CH_2O + 0.18*HYAC$                                                 | $2.1e-10$             |

## 2. Autoxidation

The MT-bRO<sub>2</sub> will undergo fast intramolecular reactions. The hydrogen-atom is shifted to form an alkyl radical where O<sub>2</sub> rapidly attaches to form a more oxidized RO<sub>2</sub> radical, which is called autoxidation. The MT-bRO<sub>2</sub> may go through several generations of autoxidation reaction. The autoxidation reactions of MT-bRO<sub>2</sub> are lumped into two generations as shown in Table S3, where the reaction rate is temperature-dependent (Berndt et al., 2016; Xu et al., 2022). The activation energies are 74.1 kJ/mol which are within in the range from previous studies (Lee et al., 2023; Moller et al., 2020; Pye et al., 2019; Roldin et al., 2019; Schervish and Donahue, 2020; Xu et al., 2019).

**Table S3.** autoxidation reaction

| Index | Reactions                                    | Reaction rate         |
|-------|----------------------------------------------|-----------------------|
| 9     | MT-bRO <sub>2</sub> → MT-cRO <sub>2</sub>    | $9.8e12*exp(-8836/T)$ |
| 10    | MT-cRO <sub>2</sub> → MT-HOM-RO <sub>2</sub> | $9.8e12*exp(-8836/T)$ |

## 3. Self- and cross-reactions for accretion products

Due to isomers of MT-RO<sub>2</sub> and ISOP-RO<sub>2</sub>, 64 self- and cross-reactions are added (Table S4), where three branches are considered for the products. First, the intermediate products are produced and are lumped as C<sub>10</sub>-ROH and C<sub>10</sub>-CBYL. Second, RO radicals are generated, and may produce HO<sub>2</sub> and C<sub>10</sub>-CBYL or decompose into smaller compounds. Half of the RO are assumed to decompose into smaller carbonyls. Third, accretion products (SOAGac20 and SOAGac15) are produced. The branching ratios of the three pathways above were set as 0.29:0.67:0.04, respectively (Xu et al., 2022). However, for the self- and cross-reactions involving MT-aRO<sub>2</sub> (APINO<sub>2</sub>, BPINO<sub>2</sub>, LIMONO<sub>2</sub>, and MYRCO<sub>2</sub>) and ISOP-RO<sub>2</sub>, a small fraction of RO radicals are possible to undergo a unimolecular H-shift to form MT-bRO<sub>2</sub>, and the branching ratio are set to 0.05 (Xu et al., 2022). The fast reaction rate are applied here based on Table S4 in Xu et al. (2022).

**Table S4.** self- and cross-reactions to form gas-phase accretion products

| Index | Reactions                                                                                                                                                     | Reaction rate |
|-------|---------------------------------------------------------------------------------------------------------------------------------------------------------------|---------------|
| 11–20 | $MT-aRO_2 + MT-aRO_2 \rightarrow$<br>$0.893*C_{10}-CBYL + 0.29*C_{10}-ROH + 0.603*HO_2 +$<br>$1.34*HYDRALD + 0.067*MT-bRO_2 + 0.04*SOAGac20$                  | 4.0e-11       |
| 21–24 | $MT-aRO_2 + MT-bRO_2 \rightarrow$<br>$0.96*C_{10}-CBYL + 0.29*C_{10}-ROH + 0.67*HO_2 +$<br>$1.34*HYDRALD + 0.04*SOAGac20$                                     | 4.0e-11       |
| 25–28 | $MT-aRO_2 + MT-cRO_2 \rightarrow$<br>$0.96*C_{10}-CBYL + 0.29*C_{10}-ROH + 0.67*HO_2 +$<br>$1.34*HYDRALD + 0.04*SOAGac20$                                     | 2.6e-10       |
| 29–32 | $MT-aRO_2 + MT-HOM-RO_2 \rightarrow$<br>$0.96*C_{10}-CBYL + 0.29*C_{10}-ROH + 0.67*HO_2 +$<br>$1.34*HYDRALD + 0.04*SOAGac20$                                  | 2.6e-10       |
| 33–56 | $MT-aRO_2 + ISOP-RO_2 \rightarrow$<br>$0.4465*C_{10}-CBYL + 0.145*C_{10}-ROH + 0.145*ROH + 0.603*HO_2 +$<br>$1.485*HYDRALD + 0.0335*MT-bRO_2 + 0.04*SOAGac15$ | 2.0e-11       |
| 57    | $MT-bRO_2 + MT-bRO_2 \rightarrow$<br>$0.96*C_{10}-CBYL + 0.29*C_{10}-ROH + 0.67*HO_2 +$<br>$1.34*HYDRALD + 0.04*SOAGac20$                                     | 4.0e-11       |
| 58    | $MT-cRO_2 + MT-cRO_2 \rightarrow$<br>$0.96*C_{10}-CBYL + 0.29*C_{10}-ROH + 0.67*HO_2 +$<br>$1.34*HYDRALD + 0.04*SOAGac20$                                     | 2.6e-10       |
| 59    | $MT-HOM-RO_2 + MT-HOM-RO_2 \rightarrow$<br>$0.96*C_{10}-CBYL + 0.29*C_{10}-ROH + 0.67*HO_2 +$<br>$1.34*HYDRALD + 0.04*SOAGac20$                               | 2.6e-10       |
| 60    | $MT-bRO_2 + MT-cRO_2 \rightarrow$<br>$0.96*C_{10}-CBYL + 0.29*C_{10}-ROH + 0.67*HO_2 +$<br>$1.34*HYDRALD + 0.04*SOAGac20$                                     | 2.6e-10       |
| 61    | $MT-bRO_2 + MT-HOM-RO_2 \rightarrow$<br>$0.96*C_{10}-CBYL + 0.29*C_{10}-ROH + 0.67*HO_2 +$<br>$1.34*HYDRALD + 0.04*SOAGac20$                                  | 2.6e-10       |
| 62    | $MT-cRO_2 + MT-HOM-RO_2 \rightarrow$<br>$0.96*C_{10}-CBYL + 0.29*C_{10}-ROH + 0.67*HO_2 +$<br>$1.34*HYDRALD + 0.04*SOAGac20$                                  | 2.6e-10       |
| 63–68 | $MT-bRO_2 + ISOP-RO_2 \rightarrow$<br>$0.48*C_{10}-CBYL + 0.145*C_{10}-ROH + 0.145*ROH +$<br>$0.67*HO_2 + 1.485*HYDRALD + 0.04*SOAGac15$                      | 2.0e-11       |
| 69–74 | $MT-cRO_2 + ISOP-RO_2 \rightarrow$<br>$0.48*C_{10}-CBYL + 0.145*C_{10}-ROH + 0.145*ROH +$<br>$0.67*HO_2 + 1.485*HYDRALD + 0.04*SOAGac15$                      | 4.0e-11       |
| 75–80 | $MT-HOM-RO_2 + ISOP-RO_2 \rightarrow$<br>$0.48*C_{10}-CBYL + 0.145*C_{10}-ROH + 0.145*ROH +$<br>$0.67*HO_2 + 1.485*HYDRALD + 0.04*SOAGac15$                   | 4.0e-11       |

#### 4. MT-RO<sub>2</sub> reactions with methylperoxy/peroxyacetyl radicals

As shown in Table S5, the reactions between original MT-RO<sub>2</sub> and CH<sub>3</sub>O<sub>2</sub>/CH<sub>3</sub>CO<sub>3</sub> are modified based on Xu et al. (2022) to consider the branch to form MT-bRO<sub>2</sub>. The rate constants remain unchanged. When MT-bRO<sub>2</sub>, MT-cRO<sub>2</sub>, and MT-HOM-RO<sub>2</sub> are terminated by methylperoxy/peroxyacetyl radicals, C<sub>10</sub>-ROH, C<sub>10</sub>-CBYL, and some small molecules are generated. The rate constants are the same as Xu et al. (2022).

**Table S5.** MT-RO<sub>2</sub> reactions with methylperoxy/peroxyacetyl radicals

| Index | Reactions                                                                                                                                                                                                                                                                                                       | Reaction rate        |
|-------|-----------------------------------------------------------------------------------------------------------------------------------------------------------------------------------------------------------------------------------------------------------------------------------------------------------------|----------------------|
| 81    | APINO <sub>2</sub> + CH <sub>3</sub> CO <sub>3</sub> →<br>0.05*MT-bRO <sub>2</sub> + 0.3705*TERPA + 0.3325*TERPA3 +<br>0.133*TERP1OOH + 0.12*CH <sub>3</sub> COCH <sub>3</sub> + 0.114*TERPF1 +<br>0.27*CH <sub>2</sub> O + HO <sub>2</sub> + CH <sub>3</sub> O <sub>2</sub> + CO <sub>2</sub>                  | 2e-12* exp(500/T)    |
| 82    | APINO <sub>2</sub> + CH <sub>3</sub> O <sub>2</sub> →<br>0.05*MT-bRO <sub>2</sub> + 0.83*CH <sub>2</sub> O + 0.133*TERPF1 + 0.399*TERPA +<br>0.19*TERPA3 + 0.1235*TERP1OOH + 0.17*CH <sub>3</sub> OH +<br>0.1045*TERPK + 0.06*CH <sub>3</sub> COCH <sub>3</sub> + 1.16*HO <sub>2</sub>                          | 2e-12                |
| 83    | BPINO <sub>2</sub> + CH <sub>3</sub> CO <sub>3</sub> →<br>0.05*MT-bRO <sub>2</sub> + 0.304*TERPK + 0.2565*TERPF1 +<br>0.3895*TERPA3 + 0.11*CH <sub>3</sub> COCH <sub>3</sub> + 0.65*CH <sub>2</sub> O + HO <sub>2</sub> +<br>CH <sub>3</sub> O <sub>2</sub> + CO <sub>2</sub>                                   | 2e-12* exp(500/T)    |
| 84    | BPINO <sub>2</sub> + CH <sub>3</sub> O <sub>2</sub> →<br>0.05*MT-bRO <sub>2</sub> + 1.4*CH <sub>2</sub> O + 0.3515*TERPF1 + 0.304*TERPK +<br>1.5*HO <sub>2</sub> + 0.08*CH <sub>3</sub> COCH <sub>3</sub> + 0.2945*TERPA3                                                                                       | 2e-12                |
| 85    | LIMONO <sub>2</sub> + CH <sub>3</sub> CO <sub>3</sub> →<br>0.05*MT-bRO <sub>2</sub> + 0.95*TERPF1 +<br>0.56*CH <sub>2</sub> O + HO <sub>2</sub> + CH <sub>3</sub> O <sub>2</sub> + CO <sub>2</sub>                                                                                                              | 2e-12* exp(500/T)    |
| 86    | LIMONO <sub>2</sub> + CH <sub>3</sub> O <sub>2</sub> →<br>0.05*MT-bRO <sub>2</sub> + 0.25*CH <sub>3</sub> OH +<br>0.95*TERPF1 + 1.03*CH <sub>2</sub> O + HO <sub>2</sub>                                                                                                                                        | 2e-12                |
| 87    | MYRCO <sub>2</sub> + CH <sub>3</sub> CO <sub>3</sub> →<br>0.05*MT-bRO <sub>2</sub> + 0.95*TERPF2 + HO <sub>2</sub> +<br>0.46*CH <sub>3</sub> COCH <sub>3</sub> + 0.42*CH <sub>2</sub> O + CH <sub>3</sub> O <sub>2</sub> + CO <sub>2</sub>                                                                      | 2e-12* exp(500/T)    |
| 88    | MYRCO <sub>2</sub> + CH <sub>3</sub> O <sub>2</sub> →<br>0.05*MT-bRO <sub>2</sub> + 0.25*CH <sub>3</sub> OH +<br>0.95*TERPF2 + 0.75*CH <sub>2</sub> O + HO <sub>2</sub>                                                                                                                                         | 2e-12                |
| 89–91 | MT-bRO <sub>2</sub> \ MT-cRO <sub>2</sub> \ MT-HOM-RO <sub>2</sub> + CH <sub>3</sub> O <sub>2</sub> →<br>0.15*CH <sub>3</sub> OH + 0.85*CH <sub>2</sub> O + 1.4*HO <sub>2</sub> + 0.7*HYDRALD +<br>0.7*CH <sub>3</sub> COCH <sub>3</sub> + 0.15*C <sub>10</sub> -ROH + 0.15*C <sub>10</sub> -CBYL               | 3.56e-14* exp(708/T) |
| 92–94 | MT-bRO <sub>2</sub> \ MT-cRO <sub>2</sub> \ MT-HOM-RO <sub>2</sub> + CH <sub>3</sub> CO <sub>3</sub> →<br>0.7*CH <sub>3</sub> O <sub>2</sub> + 0.7*HO <sub>2</sub> + 0.7*HYDRALD + 0.7*CH <sub>3</sub> COCH <sub>3</sub> +<br>0.3*CH <sub>3</sub> COOH + 0.15*C <sub>10</sub> -ROH + 0.15*C <sub>10</sub> -CBYL | 7.4e-13* exp(765/T)  |

#### 5. MT-RO<sub>2</sub> reactions with NO/NO<sub>3</sub>

As shown in Table S6, the reactions between original MT-aRO<sub>2</sub> and NO/NO<sub>3</sub> are modified based on Xu et al. (2022) to consider the branch to form MT-bRO<sub>2</sub>. The rate constants remain unchanged. The MT-

bRO<sub>2</sub>\MT-cRO<sub>2</sub> + NO reactions are similar as the default MT-aRO<sub>2</sub> + NO reactions. The MT-bRO<sub>2</sub>\MT-cRO<sub>2</sub> + NO<sub>3</sub>\HO<sub>2</sub> reactions are based on Xu et al. (2022).

**Table S6.** MT-RO<sub>2</sub> reactions with NO/NO<sub>3</sub>

| Index   | Reactions                                                                                                                                                                                                                                                                                                                          | Reaction rate       |
|---------|------------------------------------------------------------------------------------------------------------------------------------------------------------------------------------------------------------------------------------------------------------------------------------------------------------------------------------|---------------------|
| 95      | APINO <sub>2</sub> + NO →<br>0.05*MT-bRO <sub>2</sub> + 0.0095*TERPHFN + 0.019*TERPNS1 +<br>0.095*TERPNS + 0.0475*TERPNT + 0.0475*TERPNT1 +<br>0.77*NO <sub>2</sub> + 0.77*HO <sub>2</sub> + 0.285*TERPA + 0.2565*TERPA3 +<br>0.09*CH <sub>3</sub> COCH <sub>3</sub> + 0.0855*TERPF1 + 0.21*CH <sub>2</sub> O +<br>0.1045*TERP1OOH | 2.7e-12*exp(360/T)  |
| 96      | APINO <sub>2</sub> + NO <sub>3</sub> →<br>0.05*MT-bRO <sub>2</sub> + NO <sub>2</sub> + HO <sub>2</sub> + 0.3705*TERPA +<br>0.3325*TERPA3 + 0.12*CH <sub>3</sub> COCH <sub>3</sub> + 0.114*TERPF1 +<br>0.27*CH <sub>2</sub> O + 0.133*TERP1OOH                                                                                      | 2.3e-12             |
| 97      | BPINO <sub>2</sub> + NO →<br>0.05*MT-bRO <sub>2</sub> + 0.08*CH <sub>3</sub> COCH <sub>3</sub> + 0.49*CH <sub>2</sub> O +<br>0.19*TERPF1 + 0.228*TERPK + 0.038*TERPNS1 +<br>0.019*TERPNS + 0.057*TERPNT + 0.1235*TERPNT1 +<br>0.2945*TERPA3 + 0.75*HO <sub>2</sub> + 0.75*NO <sub>2</sub>                                          | 2.7e-12*exp(360/T)  |
| 98      | BPINO <sub>2</sub> + NO <sub>3</sub> →<br>0.05*MT-bRO <sub>2</sub> + 0.11*CH <sub>3</sub> COCH <sub>3</sub> + 0.65*CH <sub>2</sub> O +<br>0.2565*TERPF1 + 0.304*TERPK +<br>0.3895*TERPA3 + HO <sub>2</sub> + NO <sub>2</sub>                                                                                                       | 2.3e-12             |
| 99      | LIMONO <sub>2</sub> + NO →<br>0.05*MT-bRO <sub>2</sub> + 0.1615*TERPNT1 + 0.057*TERPNS1 +<br>0.77*NO <sub>2</sub> + 0.7315*TERPF1 + 0.77*HO <sub>2</sub> + 0.43*CH <sub>2</sub> O                                                                                                                                                  | 2.7e-12*exp(360/T)  |
| 100     | LIMONO <sub>2</sub> + NO <sub>3</sub> →<br>0.05*MT-bRO <sub>2</sub> + NO <sub>2</sub> + 0.95*TERPF1 + HO <sub>2</sub> + 0.56*CH <sub>2</sub>                                                                                                                                                                                       | 2.3e-12             |
| 101     | MYRCO <sub>2</sub> + NO →<br>0.05*MT-bRO <sub>2</sub> + 0.095*TERPNS1 +<br>0.1805*TERPNT1 + 0.71*NO <sub>2</sub> + 0.6745*TERPF2 +<br>0.33*CH <sub>3</sub> COCH <sub>3</sub> + 0.3*CH <sub>2</sub> O + 0.71*HO <sub>2</sub>                                                                                                        | 2.7e-12*exp(360/T)  |
| 102     | MYRCO <sub>2</sub> + NO <sub>3</sub> →<br>0.05*MT-bRO <sub>2</sub> + NO <sub>2</sub> + 0.95*TERPF2 +<br>0.46*CH <sub>3</sub> COCH <sub>3</sub> + 0.42*CH <sub>2</sub> O + HO <sub>2</sub>                                                                                                                                          | 2.3e-12             |
| 103–104 | MT-bRO <sub>2</sub> \MT-cRO <sub>2</sub> + NO →<br>0.01*TERPHFN + 0.02*TERPNS1 +<br>0.1*TERPNS + 0.05*TERPNT + 0.05*TERPNT1 + 0.77*NO <sub>2</sub><br>+ 0.77*HO <sub>2</sub> + 0.3*TERPA + 0.27*TERPA3 +<br>0.09*CH <sub>3</sub> COCH <sub>3</sub> + 0.09*TERPF1 + 0.21*CH <sub>2</sub> O +<br>0.11*TERP1OOH                       | 2.7e-12*exp(360/T)  |
| 105     | MT-bRO <sub>2</sub> + NO <sub>3</sub> →<br>HO <sub>2</sub> + NO <sub>2</sub> + 0.3*C <sub>10</sub> -CBYL + 0.7*HYDRALD + 0.7*ROH                                                                                                                                                                                                   | 1.2e-12             |
| 106     | MT-cRO <sub>2</sub> + NO <sub>3</sub> →<br>HO <sub>2</sub> + NO <sub>2</sub> + 0.75*C <sub>10</sub> -CBYL + 0.25*MT-HOM-RO <sub>2</sub>                                                                                                                                                                                            | 1.2e-12             |
| 107–108 | MT-bRO <sub>2</sub> \MT-cRO <sub>2</sub> + HO <sub>2</sub> →<br>0.06*CH <sub>3</sub> COCH <sub>3</sub> + 0.06*TERPF1 + 0.08*CH <sub>2</sub> O +<br>0.25*TERP1OOH + 0.48*HO <sub>2</sub> + 0.4*TERPOOH +<br>0.29*TERPA + 0.35*OH                                                                                                    | 2.6e-13*exp(1300/T) |

## 6. C<sub>10</sub> HOMs formation

When MT-HOM-RO<sub>2</sub> are oxidized by HO<sub>2</sub>\NO\NO<sub>3</sub>, three kinds of gas-phase C<sub>10</sub> HOMs are formed: two kinds of C<sub>10</sub> non-nitrate HOMs (C<sub>10</sub>-aNON and C<sub>10</sub>-bNON) and C<sub>10</sub> nitrate HOMs (C<sub>10</sub>-ON), as shown in Table S7. The rate constants are the same as MT-RO<sub>2</sub> + HO<sub>2</sub>\NO\NO<sub>3</sub> reactions in Xu et al. (2022).

**Table S7.** C<sub>10</sub> HOMs formation

| Index | Reactions                                                                                                                                   | Reaction rate |
|-------|---------------------------------------------------------------------------------------------------------------------------------------------|---------------|
| 109   | MT-HOM-RO <sub>2</sub> + HO <sub>2</sub> → C <sub>10</sub> -aNON + O <sub>2</sub>                                                           | 1.5e-11       |
| 110   | MT-HOM-RO <sub>2</sub> + NO → 0.8*NO <sub>2</sub> + 0.8*HO <sub>2</sub> + 0.4*C <sub>10</sub> -bNON + 0.8*HYDRALD + 0.2*C <sub>10</sub> -ON | 4.0e-12       |
| 111   | MT-HOM-RO <sub>2</sub> + NO <sub>3</sub> → HO <sub>2</sub> + NO <sub>2</sub> + 0.5*C <sub>10</sub> -bNON + HYDRALD                          | 1.2e-12       |

## 7. Photolysis

Only particle-phase C<sub>10</sub> HOMs undergo photolysis process (Table S8). The photolysis rate of C<sub>10</sub> HOMs is fast and set as about 1/60 of NO<sub>2</sub> photolysis rate (Xu et al., 2022).

**Table S8.** Photolysis of particle-phase C<sub>10</sub> HOMs (HOMs-SOA)

| Index   | reactions                                                                                 | rate constant |
|---------|-------------------------------------------------------------------------------------------|---------------|
| 112–117 | C <sub>10</sub> -aNON\ C <sub>10</sub> -bNON\ C <sub>10</sub> -ON (particle phase) + hv → | 0.017*jno2    |

## 8. Chemical loss of intermediate products

Three kinds of intermediate products (C<sub>10</sub>-CBYL, C<sub>10</sub>-ROH, and ROH) will react with OH radical (Table S9). Among them, C<sub>10</sub>-CBYL and C<sub>10</sub>-ROH will be transferred into MT-RO<sub>2</sub>. The rate constant is the same as Xu et al. (2022).

**Table S9.** Chemical loss of C<sub>10</sub>-CBYL and C<sub>10</sub>-ROH

| Index | Reactions                                                                                                                                                                                             | Reaction rate     |
|-------|-------------------------------------------------------------------------------------------------------------------------------------------------------------------------------------------------------|-------------------|
| 118   | C <sub>10</sub> -CBYL + OH →<br>0.125*APINO <sub>2</sub> + 0.125*BPINO <sub>2</sub> + 0.125*MYRCO <sub>2</sub> +<br>0.125*LIMONO <sub>2</sub> + 0.475*MT-bRO <sub>2</sub> + 0.025*MT-cRO <sub>2</sub> | 4.6e-12*exp(70/T) |
| 119   | C <sub>10</sub> -ROH + OH →<br>0.125*APINO <sub>2</sub> + 0.125*BPINO <sub>2</sub> + 0.125*MYRCO <sub>2</sub> +<br>0.125*LIMONO <sub>2</sub> + 0.475*MT-bRO <sub>2</sub> + 0.025*MT-cRO <sub>2</sub>  | 4.6e-12*exp(70/T) |
| 120   | ROH + OH → HO <sub>2</sub> + CH <sub>3</sub> COCH <sub>3</sub>                                                                                                                                        | 4.6e-12*exp(70/T) |

## **9. Wet and dry deposition of newly added species**

All the newly added SOAG and SOA follows the same deposition processes with the original SOA and SOAG in VBS approach. ROH and MT-RO<sub>2</sub> do not go through both wet and dry deposition processes. The C<sub>10</sub>-CBYL and C<sub>10</sub>-ROH are dry and wet deposited using the same parameters as acetic acid (Xu et al., 2022).

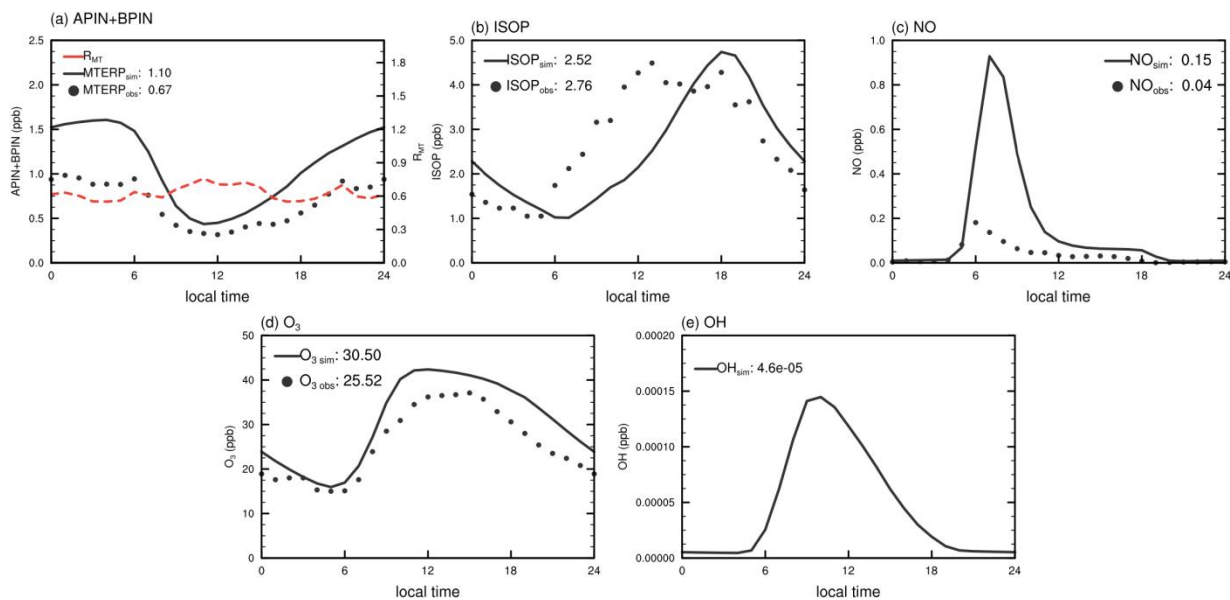

**Figure S1.** The diurnal cycle of simulated (black solid lines) and observed (black dots) surface (a) monoterpenes, (b) isoprene, (c) NO, (d) O<sub>3</sub>, and (e) OH radical concentrations at the Centreville site. The ratio of the observed monoterpenes to the simulated monoterpenes ( $R_{MT}$ ) are shown in red dashed line.

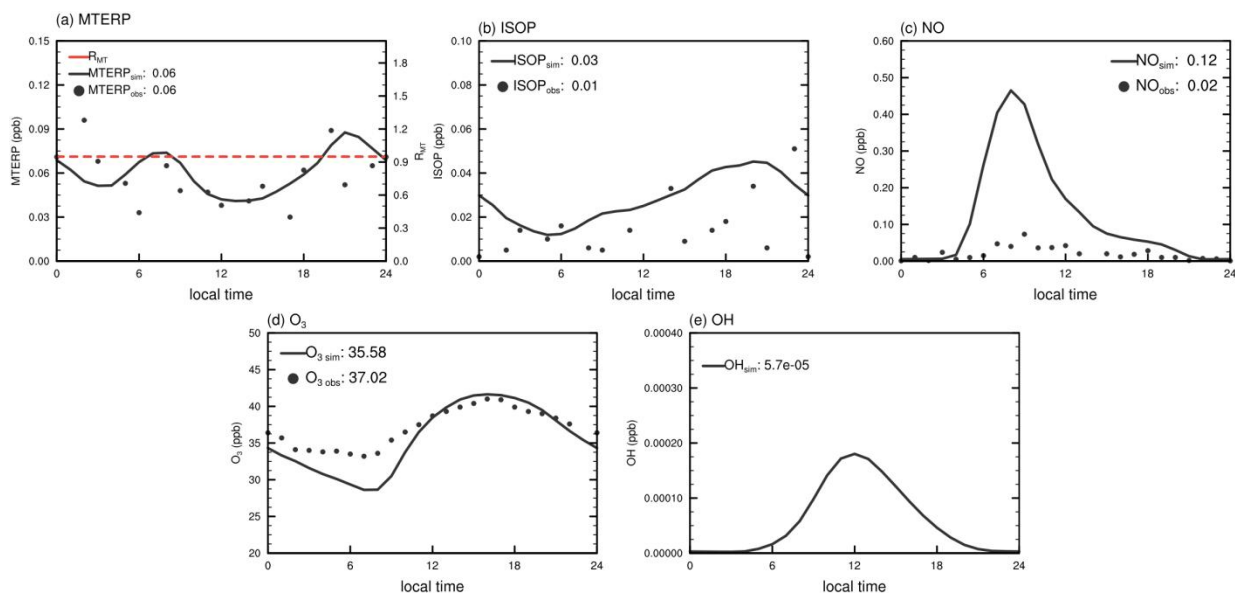

**Figure S2.** Same as Figure S1, but at the SMEAR II site.

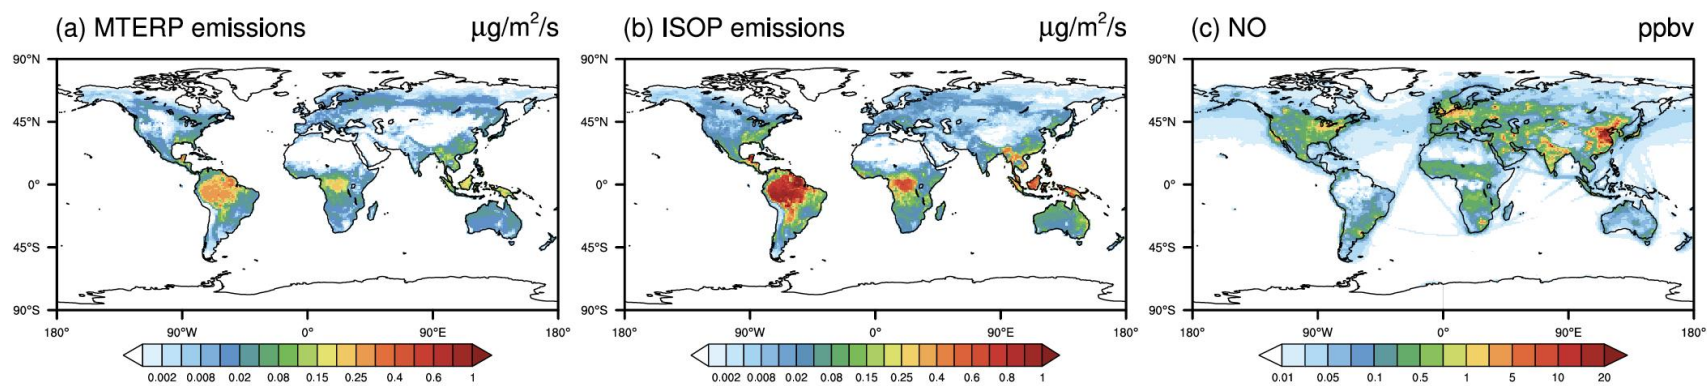

**Figure S3.** 2013 annual averaged surface (a) MTERP emissions (unit:  $\mu\text{g}/\text{m}^3/\text{s}$ ), (b) ISOP emissions (unit:  $\mu\text{g}/\text{m}^3/\text{s}$ ), (c) NO concentration (unit: ppbv) in Control experiment.

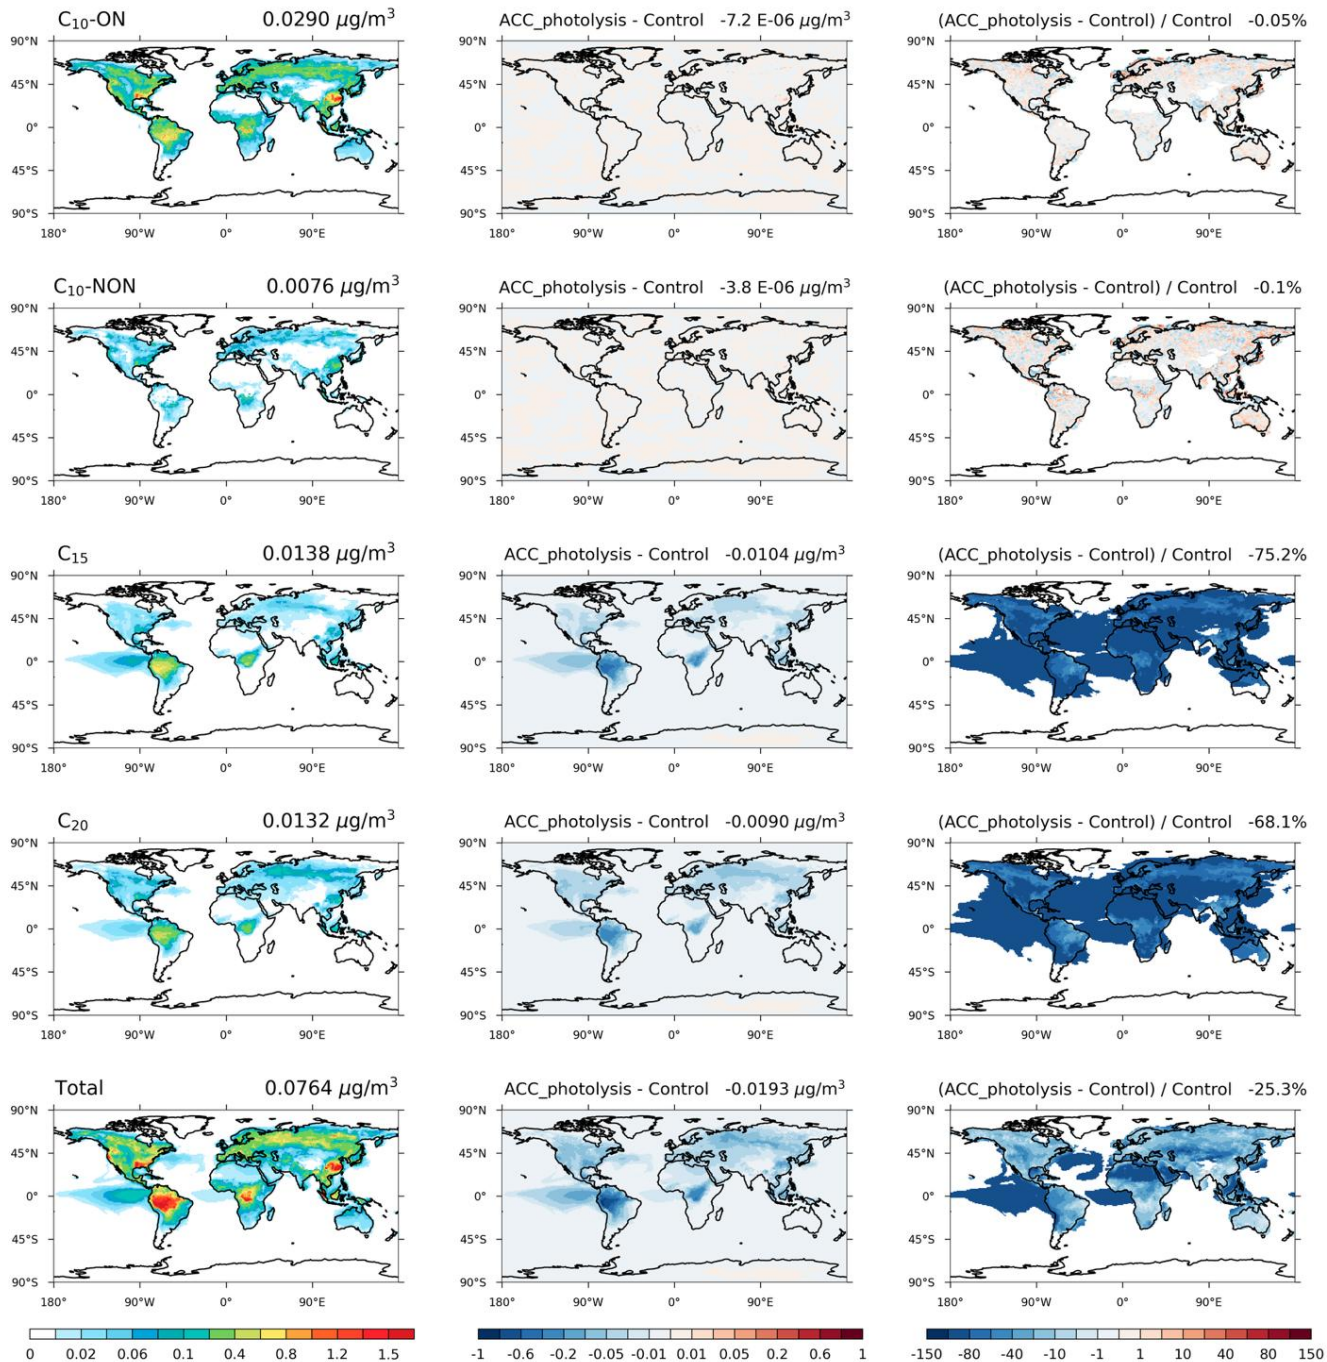

**Figure S4.** Global distributions of particle-phase HOMs in the control simulation (left column), the absolute changes due to accretion product photolysis (ACC\_photolysis - Control; middle column), and the relative changes (right column). Each row represents a specific HOM category:  $\text{C}_{10\text{-ON}}$ ,  $\text{C}_{10\text{-NON}}$ ,  $\text{C}_{15}$ ,  $\text{C}_{20}$ , and the total. Proportions are only shown in regions where MTSOA or total SOA is greater than 10% of the global average.

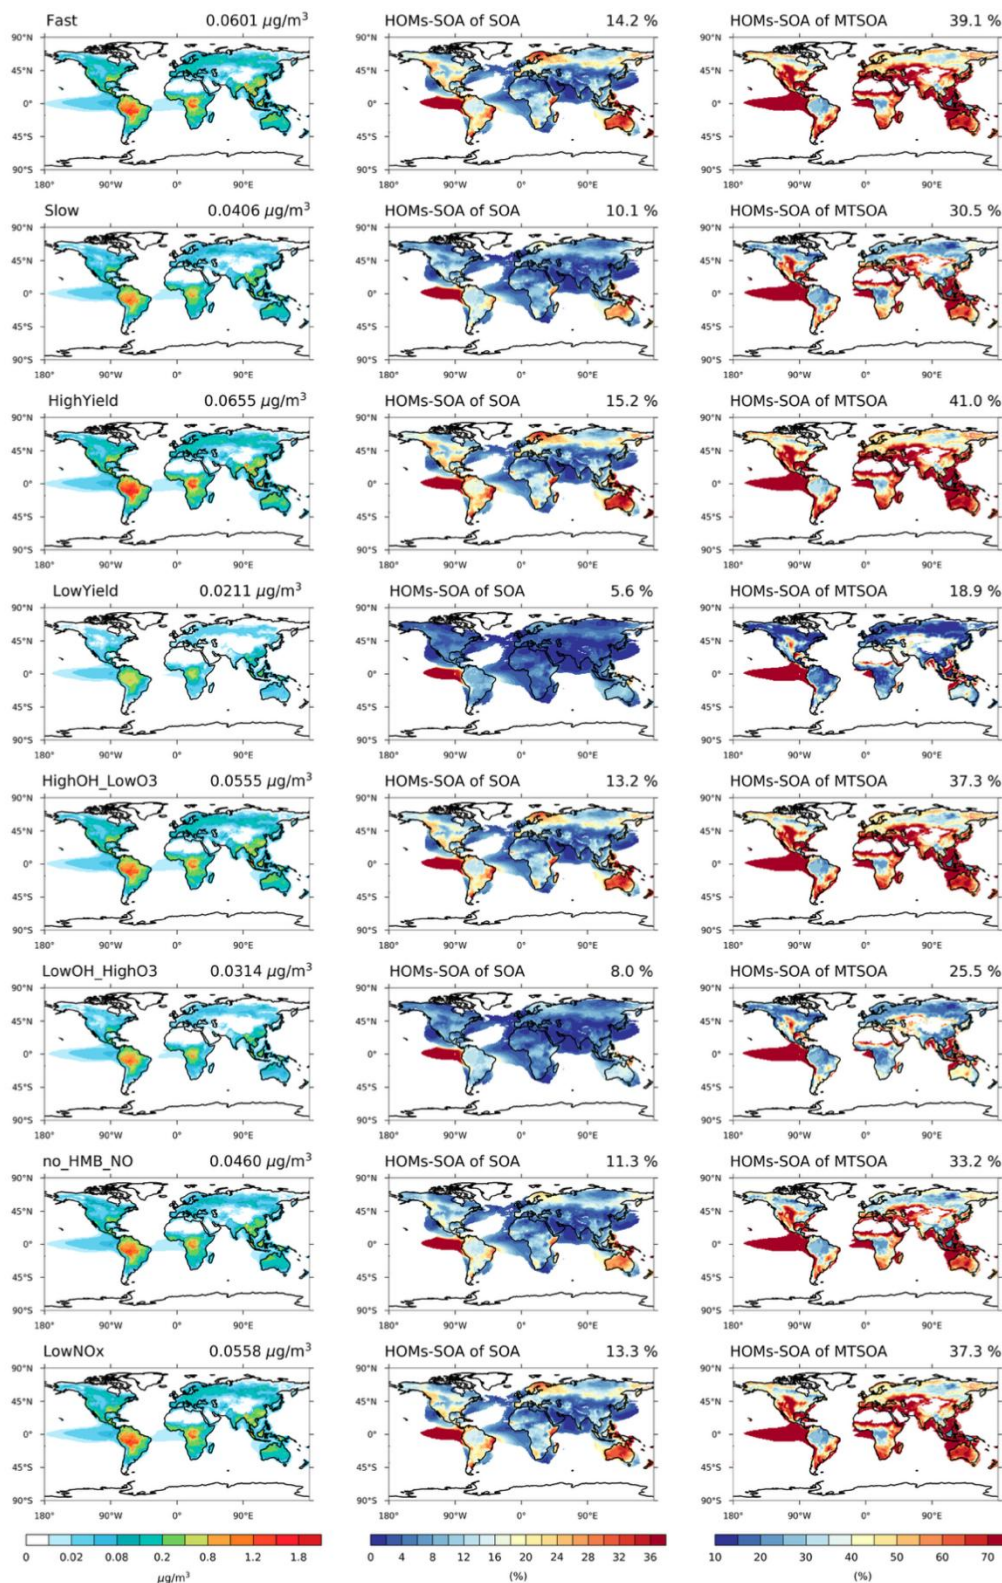

**Figure S5.** Global distribution of HOMs-SOA concentrations ( $\mu\text{g}/\text{m}^3$ ) and their contributions to SOA (middle column) and MTSOA (right column) across different sensitivity experiments. The global average value is displayed in the upper right corner of each panel. Proportions are only shown in regions where MTSOA or total SOA is greater than 10% of the global average.

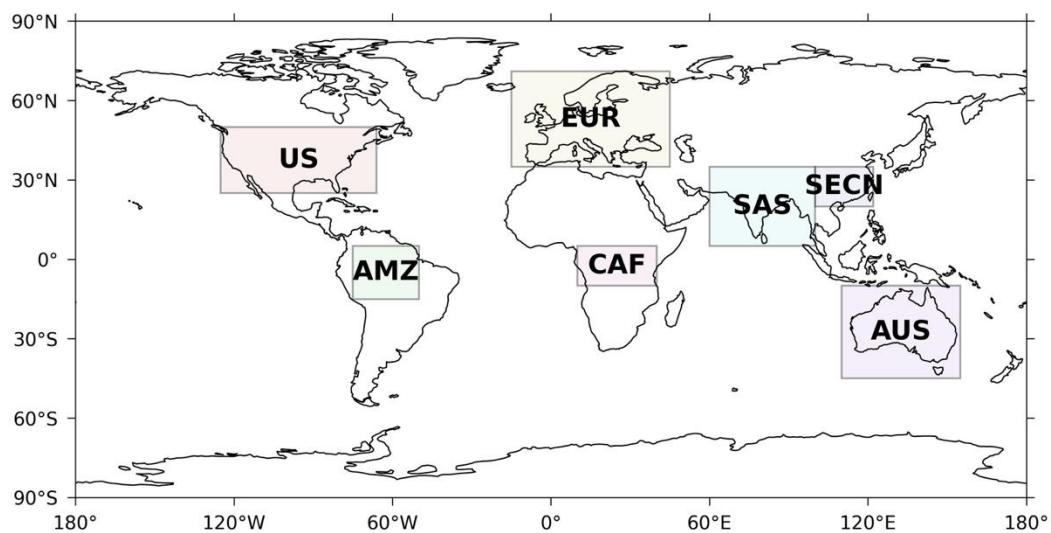

**Figure S6.** Map showing the geographic locations of different regions analyzed in this study: Amazon Basin (AMZ), Continental U.S. (US), Southeastern China (SECN), Europe (EUR), Australia (AUS), South Asia (SAS), Central Africa (CAF).

**Table S10.** Mass yield of SOAG at five traditional VBS bins.

| VOCs                                    | Oxidations                   | SOAG0  | SOAG1  | SOAG2  | SOAG3    | SOAG4    |
|-----------------------------------------|------------------------------|--------|--------|--------|----------|----------|
| Isoprene                                | O <sub>3</sub>               |        |        |        | 0.0033   |          |
|                                         | NO <sub>3</sub>              |        |        |        | 0.059024 | 0.025024 |
| Monoterpenes                            | O <sub>3</sub>               | 0.0508 | 0.1149 | 0.0348 | 0.0554   | 0.1278   |
|                                         | OH (low NO <sub>x</sub> )    | 0.0508 | 0.1149 | 0.0348 | 0.0554   | 0.1278   |
|                                         | OH (high NO <sub>x</sub> )   | 0.0245 | 0.0082 | 0.0772 | 0.0332   | 0.13     |
|                                         | NO <sub>3</sub> <sup>-</sup> |        |        |        | 0.17493  | 0.59019  |
| β-caryophyllene surrogate sesquiterpene | O <sub>3</sub>               | 0.2202 | 0.2067 | 0.0653 | 0.1284   | 0.114    |
|                                         | OH (low NO <sub>x</sub> )    | 0.2202 | 0.2067 | 0.0653 | 0.1284   | 0.114    |
|                                         | OH (high NO <sub>x</sub> )   | 0.1279 | 0.1792 | 0.0676 | 0.079    | 0.1254   |
|                                         | NO <sub>3</sub>              |        |        |        | 0.17493  | 0.59019  |
| Glyoxal                                 | OH                           | 1.0    |        |        |          |          |
| IVOC                                    | OH (low NO <sub>x</sub> )    | 0.2381 | 0.1308 | 0.0348 | 0.0076   | 0.0113   |
|                                         | OH (high NO <sub>x</sub> )   | 0.1056 | 0.1026 | 0.0521 | 0.0143   | 0.0166   |
| SVOC                                    | OH                           | 0.5931 | 0.1534 | 0.0459 | 0.0085   | 0.0128   |
| Benzene                                 | OH (low NO <sub>x</sub> )    | 0.0023 | 0.0008 | 0.0843 | 0.0443   | 0.1621   |
|                                         | OH (high NO <sub>x</sub> )   | 0.0097 | 0.0034 | 0.1579 | 0.0059   | 0.0536   |
| Toluene                                 | OH (low NO <sub>x</sub> )    | 0.1364 | 0.0101 | 0.0763 | 0.2157   | 0.0738   |
|                                         | OH (high NO <sub>x</sub> )   | 0.0154 | 0.0452 | 0.0966 | 0.0073   | 0.238    |
| Xylenes                                 | OH (low NO <sub>x</sub> )    | 0.1677 | 0.0174 | 0.086  | 0.0512   | 0.1598   |
|                                         | OH (high NO <sub>x</sub> )   | 0.0063 | 0.0237 | 0.0025 | 0.011    | 0.1185   |

**Table S11.** Species for HOMs-SOA formation mechanism.

| Species                                        | Molecular formula                                | Description                                                                                                                         |
|------------------------------------------------|--------------------------------------------------|-------------------------------------------------------------------------------------------------------------------------------------|
| APIN <sup>b</sup>                              | C <sub>10</sub> H <sub>16</sub>                  | α-pinene                                                                                                                            |
| BPIN <sup>b</sup>                              | C <sub>10</sub> H <sub>16</sub>                  | β-pinene                                                                                                                            |
| LIMON <sup>b</sup>                             | C <sub>10</sub> H <sub>16</sub>                  | Limonene                                                                                                                            |
| MYRC <sup>b</sup>                              | C <sub>10</sub> H <sub>16</sub>                  | Myrcene                                                                                                                             |
| APINO <sub>2</sub> <sup>b</sup>                | C <sub>10</sub> H <sub>17</sub> O <sub>3</sub>   | peroxy radical from OH + α-pinene reaction                                                                                          |
| BPINO <sub>2</sub> <sup>b</sup>                | C <sub>10</sub> H <sub>17</sub> O <sub>3</sub>   | peroxy radical from OH + β-pinene reaction                                                                                          |
| LIMONO <sub>2</sub> <sup>b</sup>               | C <sub>10</sub> H <sub>17</sub> O <sub>3</sub>   | peroxy radical from OH + limonene                                                                                                   |
| MYRCO <sub>2</sub> <sup>b</sup>                | C <sub>10</sub> H <sub>17</sub> O <sub>3</sub>   | peroxy radical from OH + myrcene                                                                                                    |
| ISOPB1O <sub>2</sub> <sup>b</sup>              | C <sub>5</sub> H <sub>9</sub> O <sub>3</sub>     | OH-1-O <sub>2</sub> -2--isoprene hydroxy peroxy radical                                                                             |
| ISOPZD1O <sub>2</sub> <sup>b</sup>             | C <sub>5</sub> H <sub>9</sub> O <sub>3</sub>     | OH-1-O <sub>2</sub> -4-Z--isoprene hydroxy peroxy radical                                                                           |
| ISOPZD4O <sub>2</sub> <sup>b</sup>             | C <sub>5</sub> H <sub>9</sub> O <sub>3</sub>     | OH-4-O <sub>2</sub> -1-Z--isoprene hydroxy peroxy radical                                                                           |
| ISOPED1O <sub>2</sub> <sup>b</sup>             | C <sub>5</sub> H <sub>9</sub> O <sub>3</sub>     | OH-1-O <sub>2</sub> -4-E--isoprene hydroxy peroxy radical                                                                           |
| ISOPED4O <sub>2</sub> <sup>b</sup>             | C <sub>5</sub> H <sub>9</sub> O <sub>3</sub>     | OH-4-O <sub>2</sub> -1-E--isoprene hydroxy peroxy radical                                                                           |
| ISOPB4O <sub>2</sub> <sup>b</sup>              | C <sub>5</sub> H <sub>9</sub> O <sub>3</sub>     | OH-4-O <sub>2</sub> -3--isoprene hydroxy peroxy radical                                                                             |
| MT-bRO <sub>2</sub> <sup>a</sup>               | C <sub>10</sub> H <sub>16</sub> O <sub>4</sub>   | RO <sub>2</sub> from monoterpene+O <sub>3</sub> /OH that can undergo autoxidation                                                   |
| MT-cRO <sub>2</sub> <sup>a</sup>               | C <sub>10</sub> H <sub>16</sub> O <sub>6</sub>   | RO <sub>2</sub> from MT-bRO <sub>2</sub> autoxidation                                                                               |
| MT-HOM-RO <sub>2</sub> <sup>a</sup>            | C <sub>10</sub> H <sub>16</sub> O <sub>8</sub>   | RO <sub>2</sub> from MT-cRO <sub>2</sub> autoxidation                                                                               |
| C <sub>10</sub> -aNON <sup>a</sup>             | C <sub>10</sub> H <sub>14</sub> O <sub>9</sub>   | gas-phase C <sub>10</sub> HOMs product without nitrate from HO <sub>2</sub> reaction                                                |
| C <sub>10</sub> -bNON <sup>a</sup>             | C <sub>10</sub> H <sub>14</sub> O <sub>9</sub>   | gas-phase C <sub>10</sub> HOMs product without nitrate from NO and NO <sub>3</sub> reaction                                         |
| C <sub>10</sub> -ON <sup>a</sup>               | C <sub>10</sub> H <sub>14</sub> O <sub>9</sub> N | gas-phase C <sub>10</sub> HOMs product with nitrate from NO reaction                                                                |
| SOAGac15 <sup>a</sup>                          | C <sub>15</sub> H <sub>18</sub> O <sub>7</sub>   | gas-phase C <sub>15</sub> accretion product from isoprene-derived RO <sub>2</sub> (ISOP-RO <sub>2</sub> ) + MT-RO <sub>2</sub>      |
| SOAGac20 <sup>a</sup>                          | C <sub>20</sub> H <sub>32</sub> O <sub>8</sub>   | gas-phase C <sub>20</sub> accretion product from MT-RO <sub>2</sub> + MT-RO <sub>2</sub>                                            |
| C <sub>10</sub> -aNON (particle phase)         | C <sub>10</sub> H <sub>14</sub> O <sub>9</sub>   | particle-phase C <sub>10</sub> HOMs product without nitrate from HO <sub>2</sub> reaction                                           |
| C <sub>10</sub> -bNON (particle phase)         | C <sub>10</sub> H <sub>14</sub> O <sub>9</sub>   | particle-phase C <sub>10</sub> HOMs product without nitrate from NO and NO <sub>3</sub> reaction                                    |
| C <sub>10</sub> -ON (particle phase)           | C <sub>10</sub> H <sub>14</sub> O <sub>9</sub> N | particle-phase C <sub>10</sub> HOMs product with nitrate from NO reaction                                                           |
| C <sub>15</sub> (particle phase)               | C <sub>15</sub> H <sub>18</sub> O <sub>7</sub>   | particle-phase C <sub>15</sub> accretion product from isoprene-derived RO <sub>2</sub> (ISOP-RO <sub>2</sub> ) + MT-RO <sub>2</sub> |
| C <sub>20</sub> (particle phase)               | C <sub>20</sub> H <sub>32</sub> O <sub>8</sub>   | particle-phase C <sub>20</sub> accretion product from MT-RO <sub>2</sub> + MT-RO <sub>2</sub>                                       |
| ROH <sup>a</sup>                               | C <sub>3</sub> H <sub>8</sub> O                  | lumped alcohols with more than 2 carbons                                                                                            |
| C <sub>10</sub> -CBYL <sup>a</sup>             | C <sub>10</sub> H <sub>17</sub> O <sub>3</sub>   | Carbonyl with 10 carbon atoms                                                                                                       |
| C <sub>10</sub> -ROH <sup>a</sup>              | C <sub>10</sub> H <sub>17</sub> O <sub>3</sub>   | Alcohol with 10 carbon atoms                                                                                                        |
| BIGALK                                         | C <sub>3</sub> H <sub>12</sub>                   | lumped alkanes C>3                                                                                                                  |
| CO <sup>b</sup>                                | CO                                               | carbon monoxide                                                                                                                     |
| CO <sub>2</sub> <sup>b</sup>                   | CO <sub>2</sub>                                  | carbon dioxide                                                                                                                      |
| CH <sub>2</sub> O <sup>b</sup>                 | CH <sub>2</sub> O                                | formaldehyde                                                                                                                        |
| CH <sub>3</sub> O <sub>2</sub> <sup>b</sup>    | CH <sub>3</sub> O <sub>2</sub>                   | methylperoxy radical                                                                                                                |
| CH <sub>3</sub> CO <sub>3</sub> <sup>b</sup>   | CH <sub>3</sub> CO <sub>3</sub>                  | acetylperoxy radical                                                                                                                |
| CH <sub>3</sub> COCH <sub>3</sub> <sup>b</sup> | CH <sub>3</sub> COCH <sub>3</sub>                | acetone                                                                                                                             |
| CH <sub>3</sub> COOH <sup>b</sup>              | CH <sub>3</sub> COOH                             | acetic acid                                                                                                                         |
| CH <sub>3</sub> OH <sup>b</sup>                | CH <sub>3</sub> OH                               | methanol                                                                                                                            |
| HO <sub>2</sub> <sup>b</sup>                   | HO <sub>2</sub>                                  | hydroperoxyl radical                                                                                                                |

|                                            |                                                 |                                                                                         |
|--------------------------------------------|-------------------------------------------------|-----------------------------------------------------------------------------------------|
| H <sub>2</sub> O <sub>2</sub> <sup>b</sup> | H <sub>2</sub> O <sub>2</sub>                   | hydrogen peroxide                                                                       |
| HCOOH <sup>b</sup>                         | HCOOH                                           | formic acid                                                                             |
| HMHP <sup>b</sup>                          | CH <sub>4</sub> O <sub>3</sub>                  | hydroxy methyl hydroperoxide                                                            |
| HYAC <sup>b</sup>                          | CH <sub>3</sub> COCH <sub>2</sub> OH            | hydroxyacetone                                                                          |
| HYDRALD <sup>b</sup>                       | HOCH <sub>2</sub> CCH <sub>3</sub> CHCHO        | lumped unsaturated hydroxycarbonyl                                                      |
| TERP1OOH <sup>b</sup>                      | C <sub>10</sub> H <sub>18</sub> O <sub>3</sub>  | terpene-derived hydroxy hydroperoxide with 1 double bond                                |
| TERPA <sup>b</sup>                         | C <sub>10</sub> H <sub>16</sub> O <sub>2</sub>  | aldehyde terpene product with no double bonds that contains a ring like pinonaldehyde   |
| TERPACID <sup>b</sup>                      | C <sub>10</sub> H <sub>16</sub> O <sub>4</sub>  | carboxylic acid/peracid from TERPA                                                      |
| TERPA2 <sup>b</sup>                        | C <sub>9</sub> H <sub>14</sub> O <sub>2</sub>   | TERPA oxidation product with no double bonds that contains an aldehydic group           |
| TERPA2O <sub>2</sub> <sup>b</sup>          | C <sub>9</sub> H <sub>15</sub> O <sub>4</sub>   | TERPA peroxy radical 2nd step                                                           |
| TERPA2CO <sub>3</sub> <sup>b</sup>         | C <sub>9</sub> H <sub>13</sub> O <sub>4</sub>   | acyl peroxy radical from TERPA2                                                         |
| TERPA3 <sup>b</sup>                        | C <sub>9</sub> H <sub>14</sub> O <sub>3</sub>   | aldehyde terpene product with no ring like limonaldehyde                                |
| TERPA3CO <sub>3</sub> <sup>b</sup>         | C <sub>9</sub> H <sub>13</sub> O <sub>5</sub>   | acyl peroxy radical from TERPA3                                                         |
| TERPF1 <sup>b</sup>                        | C <sub>10</sub> H <sub>16</sub> O <sub>2</sub>  | functionalized terpene product with 1 double bond typically containing carbonyl groups  |
| TERPF2 <sup>b</sup>                        | C <sub>7</sub> H <sub>10</sub> O                | functionalized terpene product with 2 double bonds typically containing carbonyl groups |
| TERPHFN <sup>b</sup>                       | C <sub>10</sub> H <sub>19</sub> NO <sub>7</sub> | terpene highly functionalized nitrate                                                   |
| TERPK <sup>b</sup>                         | C <sub>9</sub> H <sub>14</sub> O                | terpene product containing a ketone group                                               |
| TERPNS <sup>b</sup>                        | C <sub>10</sub> H <sub>17</sub> NO <sub>4</sub> | terpene-derived saturated secondary or primary nitrate                                  |
| TERPNS1 <sup>b</sup>                       | C <sub>10</sub> H <sub>17</sub> NO <sub>4</sub> | terpene-derived unsaturated secondary or primary nitrate                                |
| TERPNT <sup>b</sup>                        | C <sub>10</sub> H <sub>17</sub> NO <sub>4</sub> | terpene-derived saturated tertiary nitrate                                              |
| TERPNT1 <sup>b</sup>                       | C <sub>10</sub> H <sub>17</sub> NO <sub>4</sub> | terpene-derived unsaturated tertiary nitrate                                            |

<sup>a</sup> Xu et al. (2022)

<sup>b</sup> Schwantes et al. (2020)

**Table S12.** The Normalized Mean Bias (NMB), Correlation Coefficient (R), and Root Mean Square Error (RMSE) values of C<sub>10</sub>-HOMs (C<sub>10</sub>-ON+C<sub>10</sub>-NON) comparing two sites with observations. Site and field campaign information can be found in Table 7.

|              | Hyytiälä site |      |                           | Centreville site |      |                           |
|--------------|---------------|------|---------------------------|------------------|------|---------------------------|
|              | NMB (%)       | R    | RMSE (ng/m <sup>3</sup> ) | NMB (%)          | R    | RMSE (ng/m <sup>3</sup> ) |
| HighOH_LowO3 | 77            | 0.65 | 74                        | 119              | 0.87 | 476                       |
| LowOH_HighO3 | -46           | 0.06 | 43                        | -25              | 0.41 | 135                       |
| Fast         | 96            | 0.66 | 93                        | 141              | 0.87 | 576                       |
| Slow         | -21           | 0.17 | 30                        | 23               | 0.39 | 148                       |
| No_HMB_NO    | 3             | 0.45 | 24                        | 57               | 0.39 | 259                       |
| HighYield    | 77            | 0.65 | 74                        | 119              | 0.87 | 476                       |
| LowYield     | -69           | 0.59 | 59                        | -62              | 0.86 | 220                       |
| LowNOx       | 70            | 0.60 | 67                        | 2                | 0.40 | 111                       |
| Control      | 69            | 0.61 | 66                        | 121              | 0.74 | 497                       |

**Table S13.** The global averaged value of 2013 annual mean surface HOMs-SOA (unit: µg/m<sup>3</sup>), the contribution of HOMs-SOA to the total MTSOA and the contribution of HOMs-SOA to the total SOA (unit: %) using different sensitivity tests (Table 8).

| Experiment   | HOMs-SOA (µg/m <sup>3</sup> ) | HOMs-SOA / Total SOA | HOMs-SOA / MTSOA |
|--------------|-------------------------------|----------------------|------------------|
| Control      | 0.056                         | 11%                  | 37%              |
| LowYield     | 0.021                         | 6%                   | 19%              |
| HighYield    | 0.066                         | 15%                  | 41%              |
| HighOH_lowO3 | 0.056                         | 13%                  | 37%              |
| LowOH_HighO3 | 0.031                         | 8%                   | 26%              |
| Fast         | 0.060                         | 14%                  | 39%              |
| Slow         | 0.041                         | 10%                  | 31%              |
| no_HMB_NO    | 0.046                         | 11%                  | 33%              |
| LowNOx       | 0.056                         | 13%                  | 37%              |

**Table S14.** Molecular formulas of top 5 contributing HOM-ON and HOM-NON species (gas- and particle-phase) at Centreville, Alabama

| <b>HOM-ON</b>    |                       | <b>HOM-NON</b>   |                       |
|------------------|-----------------------|------------------|-----------------------|
| <b>Gas-phase</b> | <b>Particle-phase</b> | <b>Gas-phase</b> | <b>Particle-phase</b> |
| C10H15O7N1       | C10H15O7N1            | C10H14O7         | C10H14O7              |
| C10H17O7N1       | C10H15O8N1            | C10H12O7         | C10H12O7              |
| C10H15O8N1       | C10H17O7N1            | C10H22O8         | C10H16O7              |
| C10H17O8N1       | C10H17O8N1            | C10H22O7         | C10H22O8              |
| C10H13O8N1       | C10H15O9N1            | C10H16O7         | C10H22O7              |

**Table S15.** Molecular formulas of top 5 contributing HOM-ON and HOM-NON species (gas- and particle-phase) at Hyytiälä, Finland

| <b>HOM-ON</b>    |                       | <b>HOM-NON</b>   |                       |
|------------------|-----------------------|------------------|-----------------------|
| <b>Gas-phase</b> | <b>Particle-phase</b> | <b>Gas-phase</b> | <b>Particle-phase</b> |
| C10H15O7N1       | C10H15O8N1            | C10H12O11        | C10H14O7              |
| C10H15O8N1       | C10H15O7N1            | C10H14O8         | C10H22O9              |
| C10H17O7N1       | C10H17O7N1            | C10H16O8         | C10H22O7              |
| C10H13O7N1       | C10H17O8N1            | C10H14O7         | C10H22O8              |
| C10H17O8N1       | C10H15O9N1            | C10H22O7         | C10H16O7              |

## Reference

- Berndt, T., et al. (2016), Hydroxyl radical-induced formation of highly oxidized organic compounds, *Nat Commun*, 7, 13677, doi: 10.1038/ncomms13677.
- Ehn, M., et al. (2014), A large source of low-volatility secondary organic aerosol, *Nature*, 506(7489), 476-479, doi: 10.1038/nature13032.
- Jokinen, T., et al. (2015), Production of extremely low volatile organic compounds from biogenic emissions: Measured yields and atmospheric implications, *Proc Natl Acad Sci U S A*, 112(23), 7123-7128, doi: 10.1073/pnas.1423977112.
- Lee, B. H., S. Iyer, T. Kurtén, J. G. Varelas, J. Luo, R. J. Thomson, and J. A. Thornton (2023), Ring-opening yields and auto-oxidation rates of the resulting peroxy radicals from OH-oxidation of  $\alpha$ -pinene and  $\beta$ -pinene, *Environmental Science: Atmospheres*, 3(2), 399-407, doi: 10.1039/d2ea00133k.
- Moller, K. H., R. V. Otkjaer, J. Chen, and H. G. Kjaergaard (2020), Double Bonds Are Key to Fast Unimolecular Reactivity in First-Generation Monoterpene Hydroxy Peroxy Radicals, *J Phys Chem A*, 124(14), 2885-2896, doi: 10.1021/acs.jpca.0c01079.
- Nah, T., J. Sanchez, C. M. Boyd, and N. L. Ng (2016), Photochemical Aging of alpha-pinene and beta-pinene Secondary Organic Aerosol formed from Nitrate Radical Oxidation, *Environ Sci Technol*, 50(1), 222-231, doi: 10.1021/acs.est.5b04594.
- Piletic, I. R., and T. E. Kleindienst (2022), Rates and Yields of Unimolecular Reactions Producing Highly Oxidized Peroxy Radicals in the OH-Induced Autoxidation of alpha-Pinene, beta-Pinene, and Limonene, *J Phys Chem A*, 126(1), 88-100, doi: 10.1021/acs.jpca.1c07961.
- Pye, H. O. T., et al. (2019), Anthropogenic enhancements to production of highly oxygenated molecules from autoxidation, *Proc Natl Acad Sci U S A*, 116(14), 6641-6646, doi: 10.1073/pnas.1810774116.
- Roldin, P., et al. (2019), The role of highly oxygenated organic molecules in the Boreal aerosol-cloud-climate system, *Nat Commun*, 10(1), 4370, doi: 10.1038/s41467-019-12338-8.
- Schervish, M., and N. M. Donahue (2020), Peroxy radical chemistry and the volatility basis set, *Atmospheric Chemistry and Physics*, 20(2), 1183-1199, doi: 10.5194/acp-20-1183-2020.
- Schwantes, R. H., et al. (2020), Comprehensive isoprene and terpene gas-phase chemistry improves simulated surface ozone in the southeastern US, *Atmospheric Chemistry and Physics*, 20(6), 3739-3776, doi: 10.5194/acp-20-3739-2020.
- Weber, J., S. Archer-Nicholls, P. Griffiths, T. Berndt, M. Jenkin, H. Gordon, C. Knote, and A. T. Archibald (2020), CRI-HOM: A novel chemical mechanism for simulating highly oxygenated organic molecules (HOMs) in global chemistry–aerosol–climate models, *Atmospheric Chemistry and Physics*, 20(18), 10889-10910, doi: 10.5194/acp-20-10889-2020.
- Xu, L., K. H. Moller, J. D. Crouse, R. V. Otkjaer, H. G. Kjaergaard, and P. O. Wennberg (2019), Unimolecular Reactions of Peroxy Radicals Formed in the Oxidation of alpha-Pinene and beta-Pinene by Hydroxyl Radicals, *J Phys Chem A*, 123(8), 1661-1674, doi: 10.1021/acs.jpca.8b11726.
- Xu, R., J. A. Thornton, B. H. Lee, Y. Zhang, L. Jaeglé, F. D. Lopez-Hilfiker, P. Rantala, and T. Petäjä (2022), Global simulations of monoterpene-derived peroxy radical fates and the distributions of highly oxygenated organic molecules (HOMs) and accretion products, *Atmospheric Chemistry and Physics*, 22(8), 5477-5494, doi: 10.5194/acp-22-5477-2022.
- Yan, C., et al. (2016), Source characterization of highly oxidized multifunctional compounds in a boreal forest environment using positive matrix factorization, *Atmospheric Chemistry and Physics*, 16(19), 12715-12731, doi: 10.5194/acp-16-12715-2016.
